# Supplementary material
Source: PubMed Central journal article supplement (PMC7469246)

## Derivation and Validation of a Diagnostic Prediction Tool for Interstitial Lung Disease

*Janelle Vu Pugashetti, MD; Aleksander Kitich, MD; Shehabaldin Alqalyoobi, MD; Anne-Catherine Maynard-Paquette, MD; David Pritchard, MD; Julia Graham, MD; Noelle Boctor, MD; Andrea Kulinich, BS; Elyse Lafond, MD; Elena Foster, MS; Cesar Mendez, BS; Saad Choudhry, MD; Jean Chalaoui, MD; Julie Morisset, MD; Michael Kadoch, MD; and Justin M. Oldham, MD*

CHEST 2020; 158(2):620-629

*Online supplements are not copyedited prior to posting and the author(s) take full responsibility for the accuracy of all data.*

© 2020 AMERICAN COLLEGE OF CHEST PHYSICIANS. Reproduction of this article is prohibited without written permission from the American College of Chest Physicians. See online for more details. DOI: 10.1016/j.chest.2020.02.044

**e-Table 1. ILD-Screen Score Final Regression Model**

| <b>Variable</b>          | <b>Coefficient</b> | <b>p-value</b> | <b>95% CI</b>    |
|--------------------------|--------------------|----------------|------------------|
| Age                      | 0.0544             | <0.001         | 0.035 - 0.073    |
| TLC                      | -0.7827            | <0.001         | -1.027 - -0.538  |
| FEV1                     | 1.4567             | <0.001         | 1.0 - 1.913      |
| DLCO                     | -0.2336            | <0.001         | -0.292 - -0.175  |
| Height (cm)              | 0.0694             | <0.001         | 0.043 - 0.096    |
| Indication risk category | 1.1645             | <0.001         | 0.957 - 1.372    |
| Intercept                | -13.7755           | <0.001         | -18.097 - -9.454 |

**e-Table 2. ILD-Screen Test performance by ILD Risk Score Threshold**

| <b>ILD Risk Score</b> | <b>Sensitivity</b> | <b>Specificity</b> | <b>PPV</b> | <b>NPV</b> |
|-----------------------|--------------------|--------------------|------------|------------|
| ≥7.5                  | 0.88               | 0.72               | 0.38       | 0.97       |
| ≥7.75                 | 0.87               | 0.78               | 0.44       | 0.97       |
| ≥8                    | 0.86               | 0.81               | 0.48       | 0.97       |
| ≥8.25                 | 0.81               | 0.85               | 0.52       | 0.96       |
| ≥8.5                  | 0.78               | 0.88               | 0.56       | 0.95       |

**e-Table 3. Prospective ILD-Screen Test performance stratified by presence of cough and/or dyspnea**

| ILD-Screen         | Cough/dyspnea (+) |     | Cough/dyspnea (-) |     |
|--------------------|-------------------|-----|-------------------|-----|
|                    | ILD on chest CT   |     |                   |     |
|                    | (+)               | (-) | (+)               | (-) |
| (+)                | 43                | 41  | 6                 | 5   |
| (-)                | 12                | 164 | 1                 | 41  |
| <b>Sensitivity</b> | 0.78              |     | 0.86              |     |
| <b>Specificity</b> | 0.8               |     | 0.89              |     |
| <b>PPV</b>         | 0.51              |     | 0.55              |     |
| <b>NPV</b>         | 0.93              |     | 0.98              |     |
| <b>LR (+)</b>      | 3.9               |     | 7.8               |     |
| <b>LR (-)</b>      | 0.28              |     | 0.16              |     |

PPV = positive predictive value, NPV = negative predictive value; LR = likelihood ratio

**e-Table 4. Prospective ILD-Screen test performance in primary care versus other settings**

| ILD-Screen         | Primary Care    |     | Other Settings |     |
|--------------------|-----------------|-----|----------------|-----|
|                    | ILD on chest CT |     |                |     |
|                    | (+)             | (-) | (+)            | (-) |
| (+)                | 39              | 31  | 11             | 17  |
| (-)                | 9               | 124 | 4              | 108 |
| <b>Sensitivity</b> | 0.81            |     | 0.73           |     |
| <b>Specificity</b> | 0.8             |     | 0.86           |     |
| <b>PPV</b>         | 0.56            |     | 0.39           |     |
| <b>NPV</b>         | 0.93            |     | 0.97           |     |
| <b>LR (+)</b>      | 4.1             |     | 5.2            |     |
| <b>LR (-)</b>      | 0.24            |     | 0.32           |     |

PPV = positive predictive value, NPV = negative predictive value; LR = likelihood ratio

**e-Table 5. Sensitivity analysis of prospective ILD-Screen test performance with removal of individual variables**

| Characteristic     | Full Model  | Age removed | TLC removed | FEV1 removed | DLCO removed | Height removed | IRC removed |
|--------------------|-------------|-------------|-------------|--------------|--------------|----------------|-------------|
| <b>Sensitivity</b> | <b>0.79</b> | 0.75        | 0.76        | 0.78         | 0.78         | 0.79           | 0.78        |
| <b>Specificity</b> | <b>0.83</b> | 0.75        | 0.75        | 0.69         | 0.65         | 0.8            | 0.66        |
| <b>PPV</b>         | <b>0.51</b> | 0.41        | 0.41        | 0.36         | 0.34         | 0.47           | 0.34        |
| <b>NPV</b>         | <b>0.95</b> | 0.93        | 0.93        | 0.93         | 0.93         | 0.94           | 0.93        |

PPV = positive predictive value, NPV = negative predictive value

**e-Figure 1.** Receiver operator curves for derivation (a), external validation (b) and prospective validation (c) cohorts.

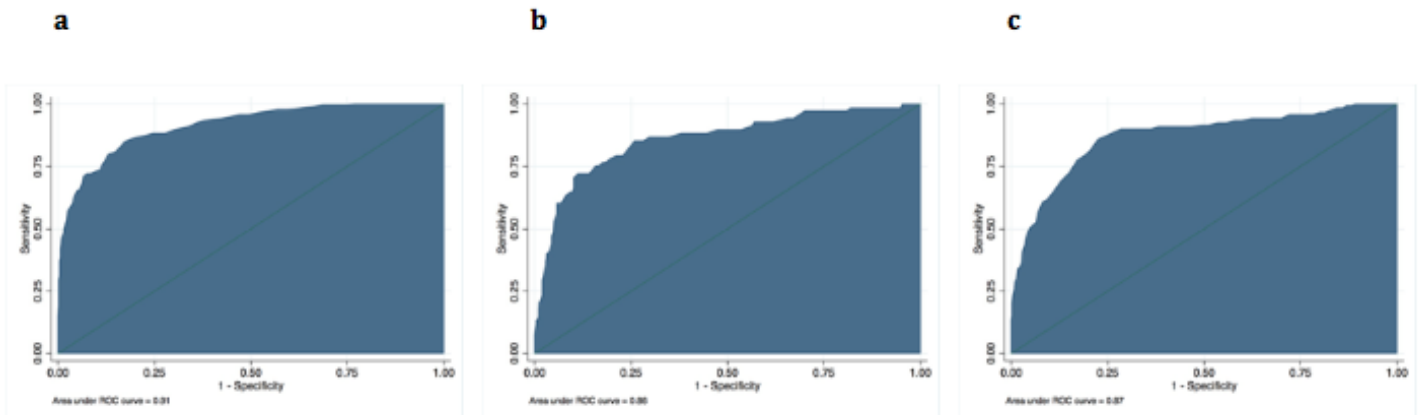

Supplement: mmc1.pdf [file mmc1.pdf]
